# Supplementary material for: Functionalized hydrogel microparticles prepared by microfluidics and their interaction with tumour marker carbonic anhydrase IX
Source: Royal Society of Chemistry journal article supplement (doi:10.1039/d0sm01018a), 2020-01-01
Supplement: d0sm01018a1.pdf [file d0sm01018a1.pdf]

## Supplementary Information

### Functionalized hydrogel microparticles prepared by microfluidics and their interaction with specific tumor marker carbonic anhydrase IX

A. Pittermannová<sup>1,4</sup>, Z. Ruberová<sup>1</sup>, D. Lizoňová<sup>1</sup>, A. Hubatová-Vacková<sup>1</sup>, O. Kašpar<sup>1</sup>, A. Zadražil<sup>1</sup>, V. Král<sup>2</sup>, M. Pechar<sup>3</sup>, R. Pola<sup>3</sup>, N. Bremond<sup>4</sup>, F. Štěpánek<sup>1</sup>, V. Tokárová<sup>1\*</sup>

<sup>1</sup> Department of Chemical Engineering, University of Chemistry and Technology, Technická 3, 166 28 Prague 6, Czech Republic, \*E-mail: [viola.tokarova@vscht.cz](mailto:viola.tokarova@vscht.cz)

<sup>2</sup> Laboratory of Structural Biology, Institute of Molecular Genetics of the Czech Academy of Sciences, Vídeňská 1083, 142 20 Prague 4, Czech Republic

<sup>3</sup> Laboratory of Biomedical Polymers, Institute of Macromolecular Chemistry, Czech Academy of Sciences, Heyrovského Nám. 2, 162 06 Prague 6, Czech Republic

<sup>4</sup> Laboratoire Colloïdes et Matériaux Divisés, ESPCI ParisTech, 10 rue Vauquelin, 75005 Paris, France

#### Fabrication process of the microfluidic chip

The microfluidic chip was made by a soft lithography technique. The master with a designed structured of the chip layout was fabricated from a silicon wafer. The microfluidic chip was prepared from the PDMS upper part to the thin layer of PDMS on a glass slide (Fig. SI 1).

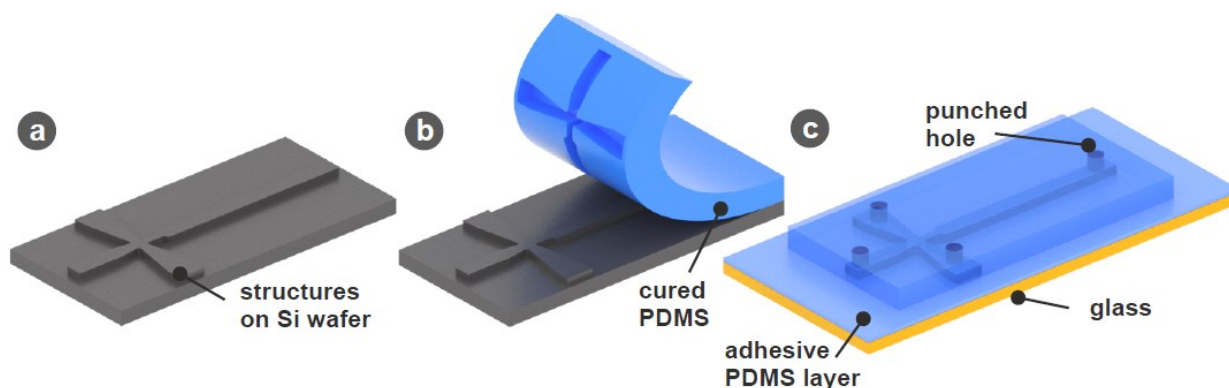

Fig. SI 1: Fabrication process of the microfluidic chip: a) silicon master with designed structures, b) cured PDMS replica, c) assembled microfluidic chip

## Fluorescent labeling and characterization of Carbonic Anhydrase IX

For the labeling, *N*-(5-Fluoresceinyl)maleimide (FLM) from Sigma-Aldrich was used, CAS 75350-46-8, with  $\lambda_{\text{ex}}$  490 nm;  $\lambda_{\text{em}}$  518 nm in 0.1 M Tris pH 8.0.

The absorption spectrum (Fig. SI 2) was measured in a 1cm cuvette using Specord 205 (Analytik Jena). The CA IX-F concentration was calculated according to the absorbance at 280 nm using extinction coefficient  $\epsilon_{\text{CA IX}} = 0.892$  after subtraction of a corresponding intensity of FLM at this wavelength.

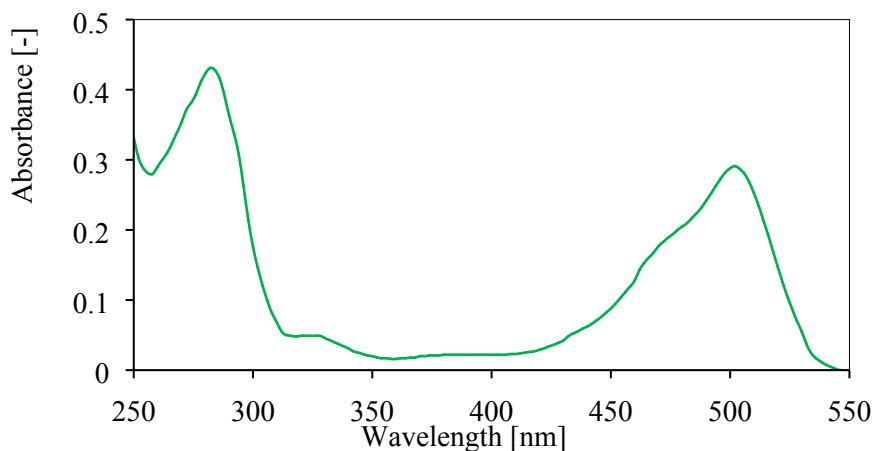

Fig. SI 2: Absorption spectrum of CA IX-F with concentration 0.4 mg/mL.

The fluorescence emission spectrum of CA IX-F (Fig. SI 3) was measured using Cary Eclipse Fluorescence Spectrophotometer (Agilent Technologies). The labelled protein exhibited fluorescence maximum at 525 nm (excitation 488 nm).

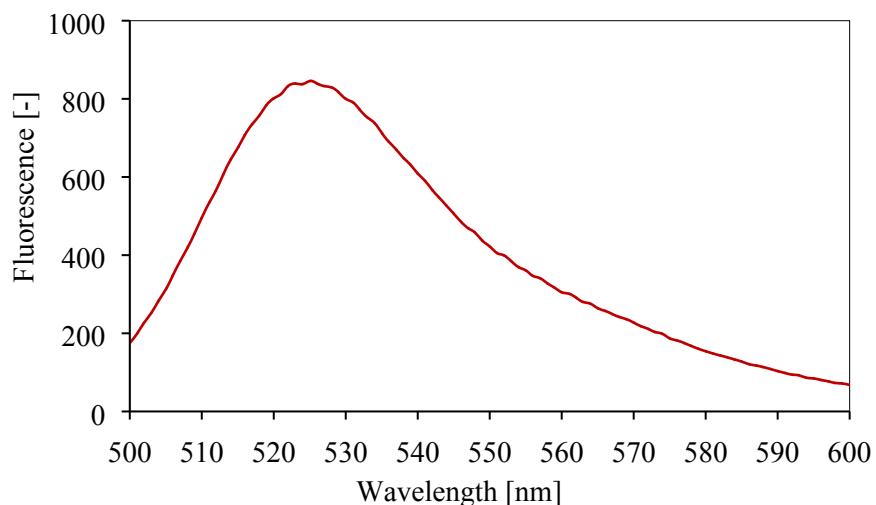

Fig. SI 3: Fluorescence emission spectrum of CA IX-F, excitation 488 nm.

## Microfluidic chip layout

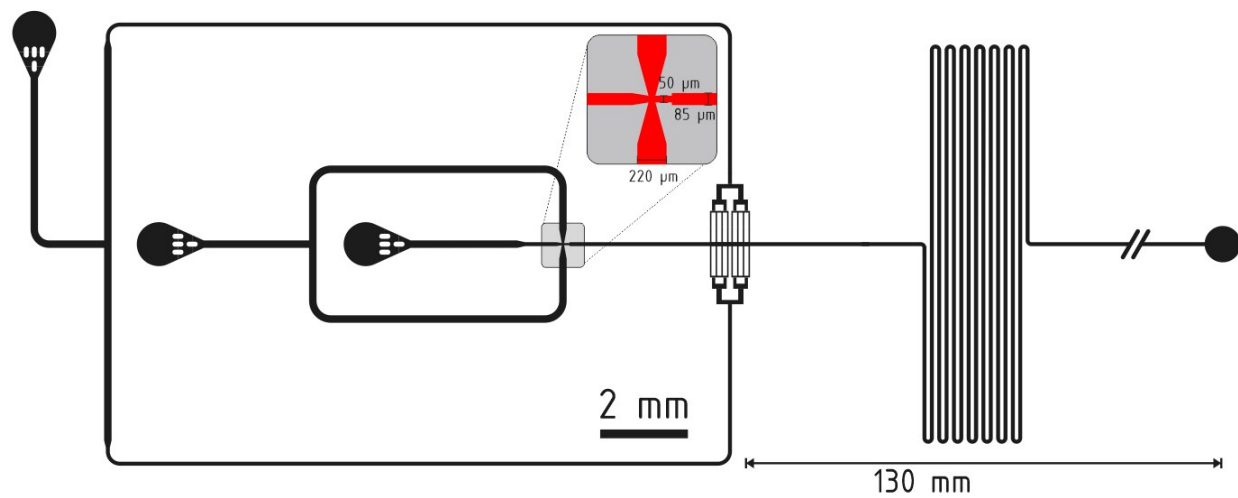

*Fig. SI 4: The layout of the 1<sup>st</sup> generation chip with a combined gelation and extraction part*

## References

1. Zavadova Z, Zavada J. Carbonic anhydrase IX (CA IX) mediates tumor cell interactions with microenvironment. *Oncology reports*. 2005 May 1;13(5):977-82.
2. Ivanov SV, Kuzmin I, Wei MH, Pack S, Geil L, Johnson BE, Stanbridge EJ, Lerman MI. Down-regulation of transmembrane carbonic anhydrases in renal cell carcinoma cell lines by wild-type von Hippel-Lindau transgenes. *Proceedings of the National Academy of Sciences*. 1998 Oct 13;95(21):12596-601.
